# Supplementary material
Source: MDPI journal article supplement (https://www.mdpi.com/2673-7272/2/3/39)
Supplement: s1 [file s1]

## Supplementary Materials

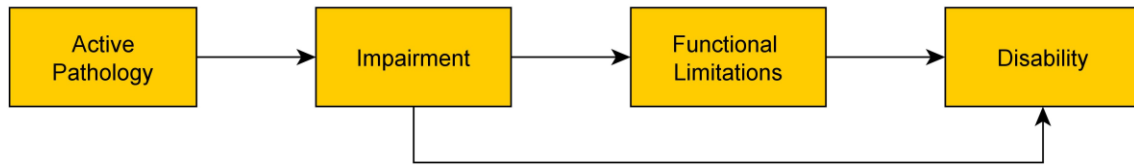

**Figure S1.** Nagi Model. Adapted from Nagi, S.Z. A Disability concepts revisited: implication for prevention. In *Disability in America*; published by National Academies Press: Washington, DC, USA, 1991 [15].

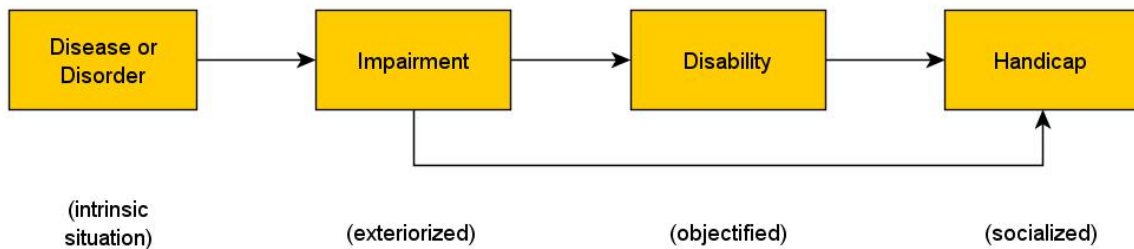

**Figure S2.** ICIDH. Reproduced from *International Classification of Impairments, Disabilities, and Handicaps: A Manual of Classification Relating to the Consequences of Disease*. Geneva, Switzerland: World Health Organization; 1980. Licence: CC BY-NC-SA 3.0 IGO [49].

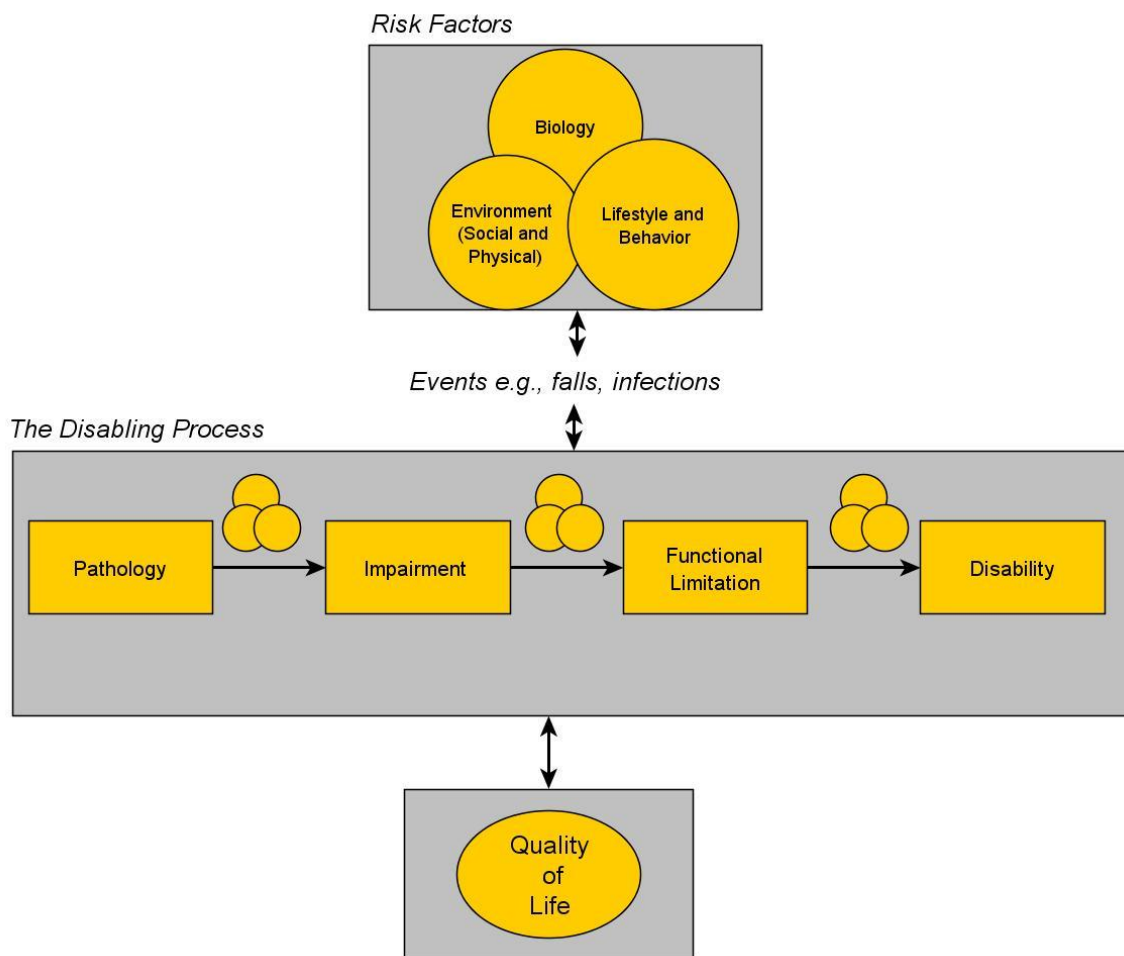

**Figure S3.** IOM 1. Institute of Medicine. 1991. *Disability in America: Toward a National Agenda for Prevention*. <https://doi.org/10.17226/1579>. Reproduced with permission from the National Academy of Sciences, Courtesy of the National Academies Press, Washington, D.C. [32].

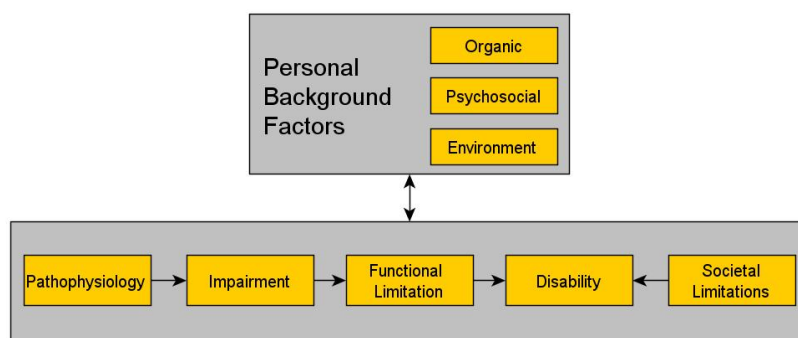

**Figure S4.** NCMRR1. Adapted from Eunice Kennedy Shriver National Institute of Child Health and Human Development (NICHD), NIH, HHS. Research Plan for the National Center for Medical Rehabilitation Research, 1993 [50].

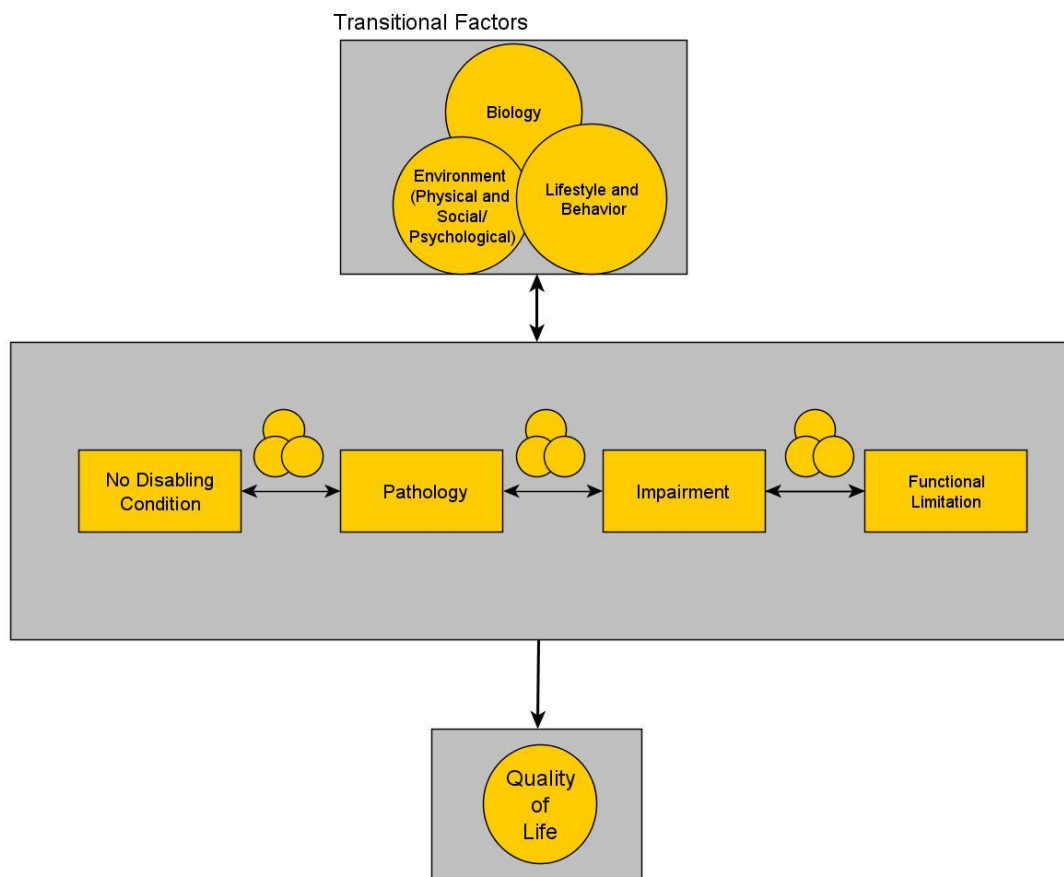

**Figure S5.** IOM2-1. Institute of Medicine. 1997. Enabling America: Assessing the Role of Rehabilitation Science and Engineering. <https://doi.org/10.17226/5799>. Reproduced with permission from the National Academy of Sciences, Courtesy of the National Academies Press, Washington, D.C [52].

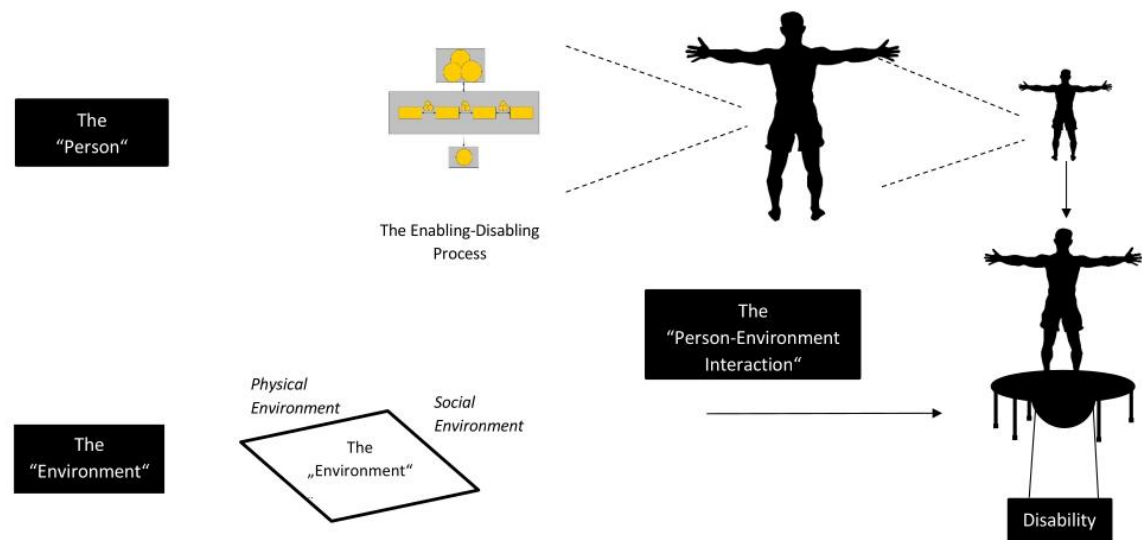

**Figure S6.** IOM2-1. Institute of Medicine. 1997. Enabling America: Assessing the Role of Rehabilitation Science and Engineering. <https://doi.org/10.17226/5799>. Reproduced with permission from the National Academy of Sciences, Courtesy of the National Academies Press, Washington, D.C [52].

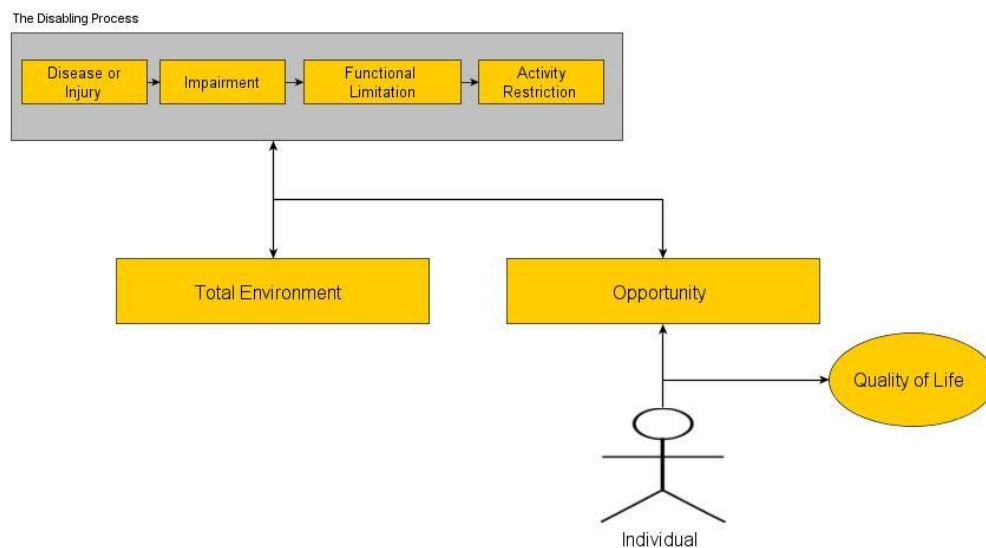

**Figure S7.** CMPH. Adapted from Patrick, D.L. Rethinking prevention for people with disabilities. Part I: A conceptual model for promoting health; published by Am. J. Health Promot., 1997 [61].

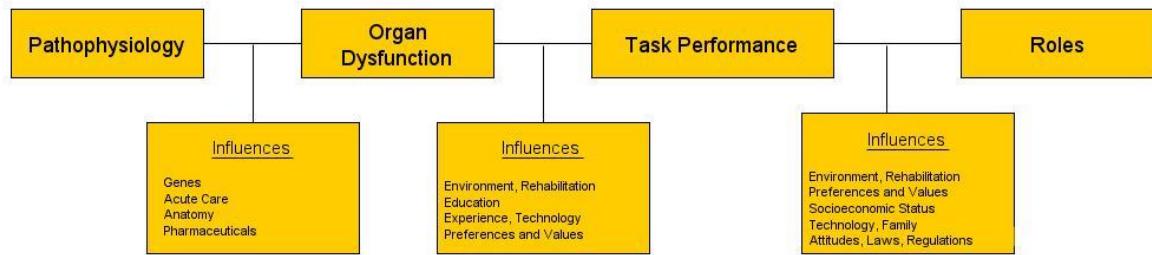

**Figure S8.** NCMRR2. Reproduced with permission from Eunice Kennedy Shriver National Institute of Child Health and Human Development (NICHD), NIH, HHS. Report to the NACHHD Council, 2006 [51].
